# Supplementary material
Source: PubMed Central journal article supplement (PMC1892965)

### Theta Pi

**a**

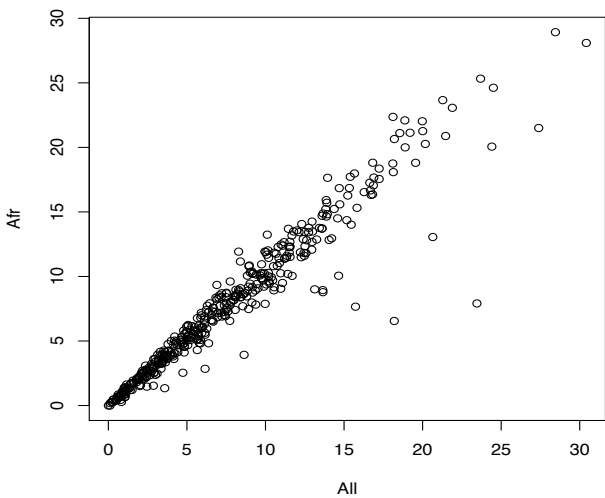

### Theta W

**b**

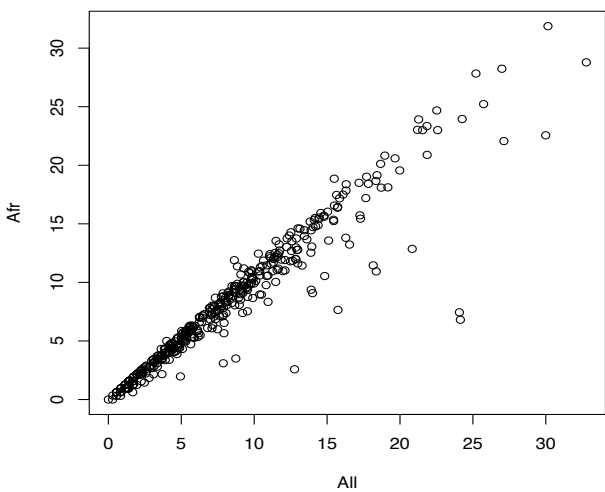

### Tajima's D

**c**

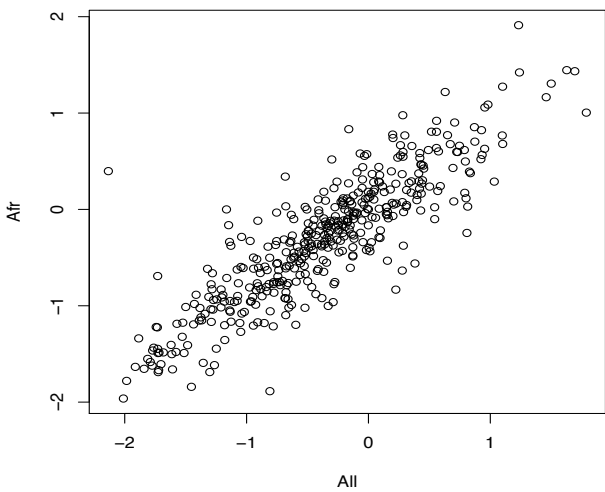

Supplement: pnas_0610385104_1.pdf [file pnas_0610385104_1.pdf]

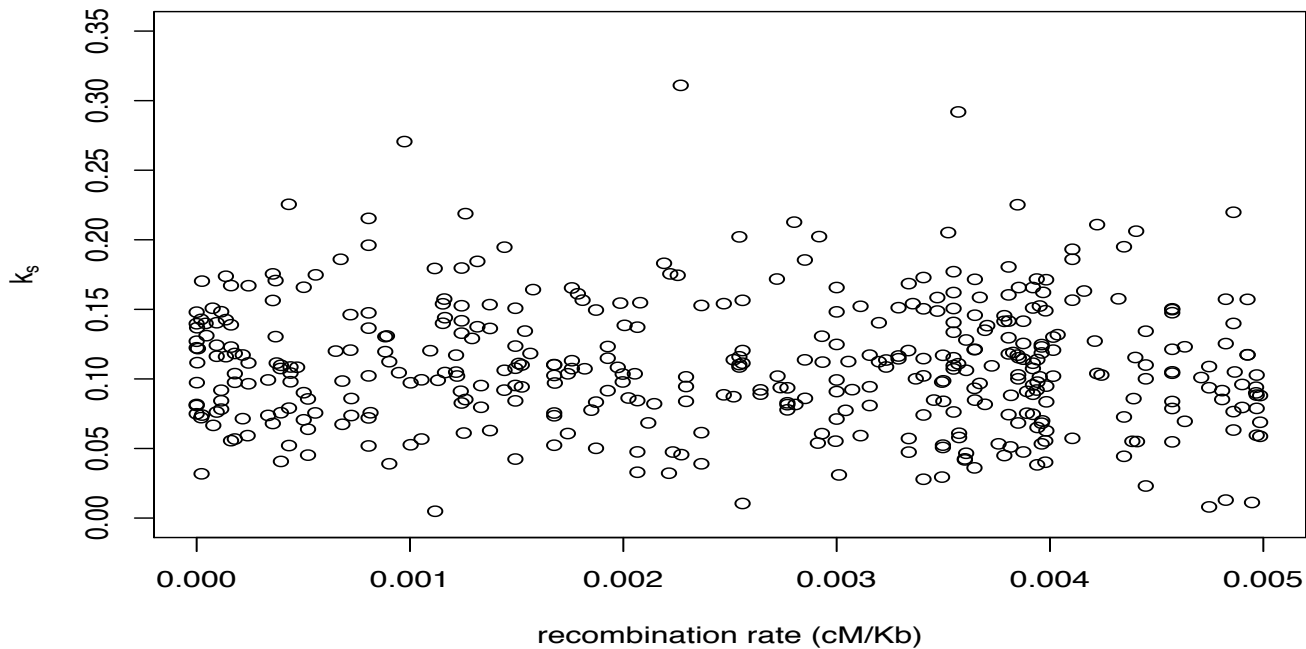

Supplement: pnas_0610385104_2.pdf [file pnas_0610385104_2.pdf]
